1 ***Salmonella* stress response mediates growth repression in succinate media**

2

3 Steven J. Hersch<sup>†</sup>, Bojana Radan, Bushra Ilyas, and William W. Navarre\*

4

5 Department of Molecular Genetics, University of Toronto, Toronto, ON, Canada

6

7

8 Running Title: *Salmonella* represses its growth in succinate

9

10

11 <sup>†</sup>Current address: Department of Ecosystem and Public Health, University of Calgary, Calgary,

12 Canada

13 \*Address correspondence to William W. Navarre, [william.navarre@utoronto.ca](mailto:william.navarre@utoronto.ca)

14 **Abstract**

15 Bacteria have evolved to sense and respond to their environment by altering gene  
16 expression and metabolism to promote growth and survival. In this work we demonstrate a novel  
17 phenotype wherein *Salmonella* actively represses its growth when using dicarboxylates such as  
18 succinate as the sole carbon source. This repression is mediated by RpoS, the RssB anti-adaptor  
19 IraP, and to a lesser degree the stringent response. We also show that small amounts of proline or  
20 citrate can act as inducers of growth in succinate media. Ultimately this regulatory cascade  
21 represses *dctA*, encoding the primary dicarboxylate importer, and constitutive expression of *dctA*  
22 induced growth. Additionally, we show that this phenotype diverges between *Salmonella* and its  
23 close relative *E. coli*, and replacing the *Salmonella* *dctA* promoter with that of *E. coli* was  
24 sufficient to abolish growth repression. We hypothesized that this divergence might reflect an  
25 adaptation to *Salmonella*'s virulent lifestyle including survival in macrophage where levels of  
26 succinate increase in response to bacterial LPS. We found that impairing *dctA* repression had no  
27 effect on *Salmonella*'s survival in acidified succinate or in macrophage but propose alternate  
28 hypotheses of fitness advantages acquired by repressing dicarboxylate uptake. In summary we  
29 identify a novel *Salmonella* phenotype and insight into its regulation. This phenotype is  
30 divergent from *E. coli* and may represent an adaptation to *Salmonella*'s virulent lifestyle.

## 31 **Importance**

32           Bacteria have evolved to sense and respond to their environment to maximize their  
33 chance of survival. By studying differences in the responses of pathogenic bacteria and closely  
34 related non-pathogens, we can gain insight into what environments they encounter inside of an  
35 infected host. Here we demonstrate that *Salmonella* diverges from its close relative *E. coli* in its  
36 response to the metabolite succinate and other dicarboxylates. We show that this is regulated by  
37 stress response proteins and ultimately can be attributed to *Salmonella* repressing its import of  
38 dicarboxylates. Though this exclusion of dicarboxylates did not influence *Salmonella*'s survival  
39 in macrophage, we propose other advantages that this trait may provide *Salmonella* within an  
40 infected host. Understanding this phenomenon may reveal a novel aspect of the *Salmonella*  
41 virulence cycle, and our characterization of its regulation yields a number of mutant strains that  
42 can be used to further study it.

## 43 **Introduction**

44 Bacteria must adapt to changing environmental conditions by sensing their surroundings  
45 and integrating signals to initiate rapid growth in nutrient rich situations or instigate defence  
46 mechanisms and metabolic hibernation in response to stress (1). Pathogenic bacteria have further  
47 adapted their mechanisms of sensing and reacting to their environment such that they are  
48 especially equipped to survive and replicate within their particular host niche. A useful approach  
49 to study differences in pathogenic and commensal bacteria is comparing the genomes and  
50 phenotypes of two well characterized enterobacteria, *E. coli* and *Salmonella*. These bacteria are  
51 closely related, yet *Salmonella* has acquired a number of adaptations that accommodate its  
52 virulent lifestyle; for example allowing *Salmonella* to invade tissues and survive within host cells  
53 such as macrophage, which is important for *Salmonella* virulence (2-6).

54 Metabolic modulation is important during conditions of stress as exemplified by the  
55 bacterial stringent response, wherein the second messenger molecule, guanosine 5'-diphosphate  
56 3'-diphosphate (ppGpp) is produced by RelA or SpoT in response to amino acid starvation or  
57 other cellular stress cues (7-10). Bacteria can also alter gene expression using the general stress  
58 response sigma factor RpoS ( $\sigma^S$ ), which has been linked to virulence in a number of pathogenic  
59 bacteria by contributing to virulence gene expression and survival within an infected host (11-  
60 13). RpoS can be activated in response to a variety of conditions including starvation, hyper-  
61 osmolarity and oxidative stress, and can be regulated at all levels of synthesis from transcription  
62 to protein degradation where it is recognized by the adaptor RssB (also known as MviA, SprE, or  
63 ExpM) and chaperoned to the ClpXP protease (14-18). In response to specific stresses, the anti-  
64 adaptors IraP, RssC (IraM in *E. coli*) and IraD can be induced, which impair RssB and thereby  
65 rapidly stabilize RpoS (19-21). Strains with reduced *rpoS* activity have been demonstrated to  
66 grow faster than wild-type *E. coli* when grown using the weak carbon source succinate,

67 suggesting that relying on succinate can induce RpoS and repress growth (22-24). Furthermore,  
68 aerobic growth using succinate relies on the dicarboxylate importer, DctA, which is known to be  
69 regulated by the DcuSR two-component system in response to dicarboxylates, as well as by  
70 DctR (YhiF) in *E. coli* lacking ATP Synthase activity (25-27).

71 Our previous studies of *Salmonella* Elongation Factor P (*efp*) mutants (which have  
72 reduced expression of ATP Synthase genes) employed phenotype microarrays that led us to find  
73 that, like *rpoS* mutants, deletion of *efp* results in improved growth using succinate as a carbon  
74 source (28-31). Here we demonstrate that in response to dicarboxylic acids as a sole carbon  
75 source, wild-type *Salmonella* shuts down its growth for an extended yet consistent length of time  
76 and that this phenotype diverges between *Salmonella* and *E. coli*. We go on to characterize this  
77 phenotype, examine the underlying regulatory mechanism, and propose evolutionary  
78 advantages it may offer *Salmonella*.

79

## 80 **Results**

### 81 ***Salmonella* delays its growth using dicarboxylic acids as a sole carbon source**

82 Our previous work investigating *Salmonella* with impaired EF-P activity demonstrated  
83 that these mutants display a hyper-active metabolism relative to wild-type when grown under  
84 specific nutrient limited conditions (28, 29). Phenotype microarrays (31) conducted in these  
85 works appeared to show a lack of growth for wild-type *Salmonella* when using succinate as the  
86 sole carbon source. To recapitulate this phenotype, we tested the growth of *Salmonella* in  
87 minimal media containing succinate as the sole carbon source. We found that the *efp* mutant, as  
88 well as an *rpoS* mutant used as a positive control, was able to grow readily (Figure 1). In  
89 contrast, wild-type *Salmonella* exhibited an extended lag phase for over 30 hours before  
90 initiating logarithmic growth. These data suggest that *Salmonella* is capable of growing on

91 succinate yet makes a regulatory decision not to using a mechanism involving RpoS and some  
92 protein(s) requiring *efp* for its efficient translation. The dicarboxylic acid transporter, DctA, was  
93 also required for growth and an isogenic *dctA* deletion strain showed no sign of growth by 48  
94 hours. Moreover, the extended lag of wild-type *Salmonella* occurred during growth on two other  
95 dicarboxylic acids, fumarate and malate (Figure 1C). Consistent with succinate, the *efp* mutant  
96 grew significantly earlier using these compounds as a sole carbon source. This suggests that the  
97 growth repression instigated by wild-type *Salmonella* is not specific to succinate but also occurs  
98 during growth using other dicarboxylic acids.

99

#### 100 **Many *Salmonella* but few *E. coli* strains delay growth using succinate**

101 To address whether the delayed growth of *Salmonella* using dicarboxylic acids as a  
102 carbon source is a genus-specific or more common phenomenon, we compared growth of  
103 *Salmonella* to the closely related bacterium, *E. coli*. We found that a lab strain of *E. coli* grew  
104 more readily in minimal media using succinate as a sole carbon source (Figure 2A). To assess a  
105 more comprehensive number of strains, we tested growth using succinate for all 105 non-  
106 typhoidal strains in the *Salmonella* Genetic Stock Centre (SGSC) collection, as well as all 72  
107 strains of the *E. coli* Reference (ECOR) collection. Though there are exceptions, the majority of  
108 *E. coli* strains grew more readily in succinate media compared to most *Salmonella* strains, which  
109 displayed extended lag phases (Figure 2B-D). Once logarithmic growth was initiated, *Salmonella*  
110 also appeared to trend towards a slightly longer doubling time than the majority of *E. coli* strains  
111 (Figure 2C and E). To ensure that the observed effects were not due to variations in RpoS  
112 activity, each strain was also screened for catalase activity as an analog of functional RpoS.  
113 Regardless of catalase activity, the trend was maintained that *E. coli* strains in general showed a  
114 shorter lag phase than *Salmonella* when using succinate as the sole carbon source (Figure S1).

115

### 116 **IraP contributes to growth repression in succinate media**

117         Since mutation of the *rpoS* gene resulted in early growth on succinate, we investigated  
118 how regulators of *rpoS* could be involved in sensing succinate media as a stress and instigating  
119 growth shutdown via RpoS. In response to specific stressors, the RpoS protein can be stabilized  
120 by three known anti-adaptor proteins, IraP, RssC and IraD, which inhibit the adaptor RssB to  
121 prevent the degradation of RpoS (14, 19, 20, 32). Similar to the  $\Delta rpoS$  strain, targeted deletion  
122 of the *Salmonella iraP* gene led to drastically earlier growth in minimal media with succinate as  
123 the sole carbon source and this phenotype could be partially complemented by expressing IraP  
124 from its native promoter on a plasmid (Figure 3). In contrast, deletion of the other anti-adaptors,  
125 RssC and IraD, had only minor effects. Deletion of the *rssB* gene itself yielded inconsistent  
126 results, likely due to suppressor mutations in *rpoS* arising to compensate for the lack of RssB-  
127 mediated RpoS degradation. These findings demonstrate that IraP plays a role in repressing  
128 *Salmonella*'s growth using succinate as the sole carbon source.

129

### 130 **Proline and citrate induce growth in succinate media**

131         To examine how *iraP* may be induced and whether *Salmonella* requires additional  
132 nutrients to grow, we supplemented succinate media with various compounds. We initially  
133 noticed that supplementation with small amounts of LB media could induce earlier growth  
134 (Figure S2). Further investigation demonstrated that addition of minute amounts of either proline  
135 or citrate induced growth in succinate media in a manner resembling a diauxy wherein growth is  
136 repressed again following depletion of the proline or citrate (Figure 4A and C). This suggests  
137 that these compounds can provide *Salmonella* with a metabolite that is either limiting with  
138 succinate as a sole carbon source or can act as a regulatory signal to alleviate growth repression.

139 Interestingly, the inducing metabolite does not appear to be proline itself as growth induction by  
140 proline (but not citrate) required the enzyme PutA, which degrades proline to glutamate.

141 We further examined proline- and citrate-induced growth using a *Salmonella relA spoT*  
142 double mutant that cannot produce the stringent response secondary messenger ppGpp. This  
143 ppGpp<sup>0</sup> strain showed slightly earlier growth in succinate than wild-type *Salmonella* but  
144 moreover did not repress growth following proline or citrate stimulation (Figure 4B and D). This  
145 suggests that following induction by proline or citrate, ppGpp plays a significant role in restoring  
146 *Salmonella*'s repressed growth state and this signal may contribute to growth shutdown in the  
147 absence of these inducers.

148

#### 149 **Repression of succinate import accounts for growth lag**

150 We hypothesized that RpoS may repress the expression of the *dctA* gene, encoding the  
151 primary dicarboxylate transporter, and thereby restrict *Salmonella* from taking up dicarboxylates  
152 such as succinate for consumption. To test if such a repression accounts for why wild-type  
153 *Salmonella* does not grow on succinate, we constitutively expressed *dctA* from a plasmid.  
154 Indeed, constitutive expression of *dctA* (but not *lacZ*) resulted in earlier growth in succinate  
155 media suggesting that the limiting factor in *Salmonella*'s growth was synthesis of the  
156 dicarboxylate importer DctA (Figure 5A and C). It therefore appears that, in *Salmonella*, RpoS  
157 represses *dctA* expression and restricts the uptake of dicarboxylic acids.

158

#### 159 **The *E. coli* *dctA* promoter is sufficient to induce *Salmonella* growth using succinate**

160 In light of the finding that the *Salmonella* *dctA* gene is repressed in succinate media, we  
161 examined the role of the *dctA* promoter ( $P_{dctA}$ ). Since the growth phenotype appears to be  
162 divergent between *Salmonella* and the closely related species *E. coli*, we compared the  $P_{dctA}$  from



163 these bacteria (Figure S3). It is possible that *Salmonella* contains a transcriptional repressor that  
164 is not present in *E. coli*, so we generated transcriptional fusion plasmids and tested the two *dctA*  
165 promoters when expressed in *E. coli*. We found that the *dctA* promoter from *Salmonella* was  
166 expressed to a lower degree (Figure S4), suggesting that it contains a distinctive region that is  
167 recognized by a common regulator that is also present in *E. coli*.

168 To further examine the impact of the *dctA* promoter, we swapped the *E. coli*  $P_{dctA}$  into the  
169 *Salmonella* chromosome using an upstream chloramphenicol resistance cassette to select for  
170 successful recombination. Replacing the 500bp upstream of the *Salmonella* *dctA* start codon with  
171 those of *E. coli* was sufficient to abolish *Salmonella*'s ability to repress its uptake of dicarboxylic  
172 acids and this strain grew readily in succinate media (Figure 5B and D). As a control, using the  
173 same method to insert *Salmonella*'s native *dctA* promoter yielded no difference from wild-type  
174 *Salmonella*. Of note, reducing the swapped region to 200bp maintained the full effect, but  
175 swapping only 54bp (constituting the 5' untranslated region) resulted in only a slight restoration  
176 of growth.

177

### 178 **Restricting succinate import does not influence survival in macrophage cell lines**

179 To probe the question of why *Salmonella* may have acquired the trait of blocking  
180 dicarboxylate utilization and what evolutionary advantage it may gain by it, we considered that  
181 succinate levels increase significantly in activated macrophage, an environment that *Salmonella*  
182 (but not *E. coli*) has adapted to survive in effectively (5, 6, 33). In the *Salmonella*-containing  
183 vacuole, the pH reaches approximately 5.0 and the lower estimates reach pH 4.4, which is  
184 comparable to the acid dissociation constants of succinate ( $pK_{a1,2} = 4.2, 5.6$ ) (34, 35). This  
185 suggests that in the acidified phagosome, succinate may become protonated and act as a proton

186 shuttle to acidify the bacterial cytoplasm. The ability of *Salmonella* to restrict its uptake of  
187 succinate could therefore provide a survival advantage in this environment.

188         Constitutive overexpression of *dctA* but not *lacZ* led to decreased survival in both  
189 acidified succinate media and in the human monocyte THP-1 cell line (Figure S5). However,  
190 overexpression of *dctA* has been demonstrated to be toxic to *E. coli* and we found that survival in  
191 acidified succinate was just as low for a *dctA* point mutant (N301A) that is defective for  
192 succinate transport (36). This implicated that the reduced survival was not due to succinate  
193 uptake but rather was an artifact of *dctA* overexpression to toxic levels. To bypass this artifact,  
194 we tested the *Salmonella* strain containing the chromosomal *dctA* promoter from *E. coli*, which  
195 grows readily in succinate media (Figure 5) yet does not constitutively overexpress *dctA* from a  
196 plasmid and so does not exhibit the associated toxic effects. Using this strain we found no  
197 decrease in survival relative to wild-type *Salmonella* in acidified succinate media or in human  
198 (THP-1) or mouse (J774) macrophage cell lines (Figure 6). As well, deletion of *dctA* or *iraP*  
199 genes did not appear to significantly influence *Salmonella* survival in THP-1 macrophage.

200

## 201 **Discussion**

202         In this work we demonstrate an uncharacterized *Salmonella* phenotype wherein it  
203 diverges from *E. coli* and restricts its growth using dicarboxylates as a sole carbon source. This  
204 phenotype does not reflect a metabolic inability of *Salmonella* to utilize dicarboxylates as we  
205 show multiple mutations in regulatory genes that allow the cells to grow early in succinate  
206 media. Rather it appears that *Salmonella* employs RpoS, IraP and to some degree RelA or SpoT  
207 to sense this environment as a stress condition and shut down expression of *dctA* to restrict its  
208 import of dicarboxylic acids. Interestingly, growth was stimulated by the addition of small  
209 amounts of citrate or proline, suggesting that these supplements can alleviate the repression. As

210 well, growth repression following proline or citrate depletion required ppGpp. Since the stringent  
211 response and ppGpp can impact the expression of *rpoS* and RssB anti-adaptors including *iraP*,  
212 RelA or SpoT may be involved in the initial sensing of succinate media as a stress and activating  
213 the IraP- and RpoS-mediated shutdown of growth (14, 37-39). These findings propose a working  
214 model of the mechanism of *Salmonella* growth repression in succinate media (Figure 7).

215 The growth repression phenotype described here is divergent between *Salmonella* and the  
216 closely related species, *E. coli*, as evidenced by sampling a range of the genetic diversity of these  
217 bacteria using the SGSC and ECOR collections. Yet there are exceptions, including a number of  
218 *Salmonella* strains that grew early despite having a catalase positive phenotype. In all instances  
219 where multiple strains from the same *Salmonella* serovar were tested, at least one exhibited an  
220 extended lag phase (Dataset S1). Thus the earlier growth does not appear to be a trait of  
221 particular serovars but rather may reflect individual strains having lost (or never acquired) the  
222 delayed growth phenotype. This could occur by mutations in genes other than *rpoS*, such as *efp*  
223 or *iraP*, that grant early growth in succinate while remaining catalase positive. Other exceptions  
224 include multiple *E. coli* strains that show an extended lag in their growth using succinate. While  
225 it is possible that these have mutations in genes required for the uptake of succinate (such as *dctA*  
226 or *dcuSR*), these may be genuine variations in how *E. coli* strains respond to succinate.

227 Replacing the *Salmonella* *dctA* promoter with that of *E. coli* was sufficient to abolish  
228 *Salmonella*'s ability to repress its uptake of succinate. This suggests that since diverging from *E.*  
229 *coli* *Salmonella* has obtained a regulatory element in its *dctA* promoter that allows it to be  
230 repressed under these conditions. Our data demonstrate that RpoS is involved in this regulation,  
231 yet RpoS is a transcriptional activator. The lack of growth on dicarboxylates suggests that *dctA* is  
232 tightly repressed, suggesting against solely sigma factor competition for RNA polymerase, but  
233 rather that RpoS likely acts via an intermediate and yet undetermined transcription factor (Figure

234 7). While it remains possible that this factor could involve a small RNA, our finding that  
235 swapping just the 5' untranslated region of *dctA* ( $P_{dctA}$  54) was insufficient to reverse growth  
236 repression suggests a protein factor acting on the promoter at the transcriptional level.

237         The difference in the response of *Salmonella* and *E. coli* to dicarboxylic acids may offer  
238 important clues to identifying the evolutionary advantage conveyed by this adaptation. Since  
239 many of the traits that *Salmonella* has acquired since their divergence are related to its  
240 pathogenic lifestyle it follows that this phenotype may reflect a situation that *Salmonella*  
241 encounters during infection of a host. Interestingly, it has recently been shown that *Salmonella*  
242 utilizes microbiota-derived succinate in the lumen of the inflamed gut (40). This suggests that the  
243 uptake of succinate in the gut employs anaerobic dicarboxylate transporters rather than DctA, or  
244 that an inducing compound such as proline or citrate is present in this environment and can  
245 stimulate succinate uptake.

246         The recent finding that succinate accumulates to high levels in activated macrophage  
247 suggests that *Salmonella*'s intracellular survival may represent the crucial selective environment  
248 that has led to the *dctA*-repression phenotype (33). It is conceivable that *Salmonella* recognizes  
249 the succinate produced by activated macrophage and restricts its uptake of this dicarboxylate in  
250 response. Our examination of *Salmonella* strains that are impaired in their regulation of succinate  
251 uptake identified no survival defect in acidified succinate or in macrophage cell lines. However, it  
252 remains possible that this repression phenotype is related to other aspects of the *Salmonella*  
253 virulence cycle beyond survival. For instance, *Salmonella* may restrict its import and  
254 consumption of succinate in order to maximize macrophage succinate levels leading to the  
255 production of the pro-inflammatory cytokine IL-1 $\beta$  (33). This would not grant *Salmonella* an  
256 advantage for survival in macrophage *per se*, but would give *Salmonella* remaining in the gut  
257 lumen a growth advantage by maximizing the immune system's oxidative burst and subsequent

258 production of tetrathionate, a compound that *Salmonella* is distinctively equipped to use as a  
259 terminal electron acceptor (41-43). Thus if *Salmonella* were to import and consume succinate in  
260 macrophage, the inflammatory response may be deterred, restricting the ability of *Salmonella* to  
261 outcompete the gut microbtioa during infection.

262 In summary, we demonstrate a divergent phenotype between *Salmonella* and *E. coli*  
263 involving regulation by RpoS, IraP and the stringent response to repress *dctA* expression and  
264 succinate uptake. This repression of dicarboxylate uptake may reflect an adaptation for  
265 *Salmonella* virulence, however its specific evolutionary benefit remains to be elucidated.

266

## 267 **Materials and Methods**

### 268 **Bacterial strains and plasmids**

269 As described previously, lambda red recombination (28, 44) and subsequent P22 phage  
270 transduction (45) was used to generate all of the gene knockout mutants in *Salmonella enterica*  
271 *subsp. enterica* serovar Typhimurium (*S. Typhimurium*) strain 14028s. *E. coli* mutants were  
272 obtained from the Keio collection in the K12 BW25113 strain background (46). To sample the  
273 genetic diversity of *Salmonella* and *E. coli* isolates, the *Salmonella* genetic stock centre (SGSC)  
274 SARA (47), SARB (48), and SARC (49) collections were employed and compared to the *E. coli*  
275 reference (ECOR) collection (50).

276 The full length *DctA* ORF was expressed from the pXG10sf plasmid under the control of  
277 the constitutively active PLtet0-1 promoter (51, 52). The IraP complementation plasmid was  
278 generated by inserting the *iraP* ORF and the upstream 300bp into pXG10sf. For promoter  
279 expression, the *dctA* promoter (500bp upstream of the *dctA* start codon) was inserted into  
280 pXG10sf to drive expression of superfolder GFP(52, 53). To generate the chromosomal *dctA*  
281 promoter swap strain, 500bp upstream of the *E. coli* *dctA* start codon, along with a

282 chloramphenicol resistance cassette for selection, was inserted into the corresponding location of  
283 the *Salmonella* chromosome.

284

### 285 **Growth using dicarboxylates as a sole carbon source**

286       Overnight LB cultures inoculated from single colonies were resuspended in MOPS  
287 minimal media with no carbon source to an optical density (OD<sub>600</sub>) of approximately 1.75. This  
288 suspension was used to inoculate (1/200 dilution) MOPS minimal media containing 0.2% carbon  
289 source (succinate unless otherwise indicated). Growth was conducted in a TECAN Infinite M200  
290 plate reader at 37°C with shaking and OD<sub>600</sub> was read every 15 minutes. For salts and hydrates of  
291 carbon sources the final concentration reflects the percent of the carbon source itself (e.g., 0.2%  
292 succinate was made as 0.47% sodium succinate dibasic hexahydrate).

293       For the SGSC and ECOR collections screen, 47 strains were assessed in duplicate per run  
294 in a 96-well plate. Wild-type and *rpoS* mutant *Salmonella* were included on every plate as  
295 quality controls. Each strain was tested on at least three separate days.

296

### 297 **Catalase assay**

298       For each replicate of the SGSC and ECOR collections screen, each strain was tested for  
299 catalase activity as an analog for RpoS function (54). In parallel to the LB overnight cultures  
300 used as inoculum, 10µl of each culture was spotted onto an LB plate. The next day the spots  
301 were tested for catalase activity by the addition of 10µl hydrogen peroxide. Bubbling was scored  
302 compared to wild-type (catalase positive) and *rpoS* mutant (catalase negative) *Salmonella*.

303

304 **Acid survival**

305 LPM media was made as described previously (55) and succinate or itaconate were added  
306 to either 0.2% or 0.4% as indicated in figures. The pH of the media was then adjusted to 4.4. LB  
307 overnight cultures were resuspended to an OD of 0.1 in acidified media and incubated in a 37°C  
308 water bath. At time points, samples were taken, serial diluted and plated for colony forming units  
309 (CFU).

310

311 **Intra-macrophage survival**

312 The THP-1 human monocyte cell line and the J774 mouse macrophage cell line were  
313 maintained in RPMI Medium 1640 (with L-glutamine) supplemented with 10% FBS and 1%  
314 Glutamax, and grown at 37°C and 5% CO<sub>2</sub>. For infection assays, THP-1 cells were seeded in 96-  
315 well plates at 50,000 per well with 50nM PMA (phorbol 12-myristate 13-acetate) added to the  
316 media to induce differentiation to adherent macrophage. After 48h, the media was replaced with  
317 normal growth media (no PMA) overnight. For infections with J774 macrophage the cells were  
318 seeded in 96-well plates at 50,000 per well overnight. *Salmonella* in RPMI were added onto  
319 seeded cells at a multiplicity of infection (MOI) of approximately 20 bacteria to 1 macrophage  
320 and centrifuged for 10 minutes at 1000rpm for maximum cell contact. After centrifuging the  
321 plate was placed at 37°C (5% CO<sub>2</sub>) and this was called 'time 0'. After 30 minutes, non-adherent  
322 *Salmonella* were washed off by three washes with PBS followed by replacement with fresh  
323 media containing 100 µg/ml gentamicin to kill extracellular *Salmonella*. At 2 hours the media  
324 was replaced with media containing gentamicin at 10 µg/ml. At timepoints, intracellular bacteria  
325 were recovered using PBS containing 1% Triton X-100 and vigorous pipetting. Samples were  
326 serially diluted and five 10µl spots were plated for CFU counting. Each sample included three  
327 separate wells as technical replicates (a total of 15 x 10µl spots counted per biological replicate).

328

329 **Acknowledgements**

330 We would sincerely like to thank Dr. Scott Gray-Owen and members of his lab, in  
331 particular Dr. Ryan Gaudet, for their generous donation of technical expertise, macrophage cells  
332 lines, and use of their equipment. WWN was supported by an Operating Grant from the Canada  
333 Institutes for Health Research (MOP-86683) and a Natural Sciences and Engineering Research  
334 Council (NSERC) of Canada Grant (RGPIN 386286-10). SJH was supported by an NSERC  
335 Vanier Canada Graduate Scholarship.

336

337 **References**

- 338 1. **Shimizu, K.** 2016. Metabolic Regulation and Coordination of the Metabolism in Bacteria in  
339 Response to a Variety of Growth Conditions. *Adv. Biochem. Eng. Biotechnol.* **155**:1-54. doi:  
340 10.1007/10\_2015\_320 [doi].
- 341 2. **Navarre, W. W., T. A. Halsey, D. Walthers, J. Frye, M. McClelland, J. L. Potter, L. J.**  
342 **Kenney, J. S. Gunn, F. C. Fang, and S. J. Libby.** 2005. Co-regulation of *Salmonella enterica*  
343 genes required for virulence and resistance to antimicrobial peptides by SlyA and PhoP/PhoQ.  
344 *Mol. Microbiol.* **56**:492-508. doi: MMI4553 [pii].
- 345 3. **Dalebroux, Z. D., and S. I. Miller.** 2014. *Salmonellae* PhoPQ regulation of the outer  
346 membrane to resist innate immunity. *Curr. Opin. Microbiol.* **17**:106-113. doi:  
347 10.1016/j.mib.2013.12.005 [doi].
- 348 4. **Tu, X., T. Latifi, A. Bougdour, S. Gottesman, and E. A. Groisman.** 2006. The PhoP/PhoQ  
349 two-component system stabilizes the alternative sigma factor RpoS in *Salmonella enterica*. *Proc.*  
350 *Natl. Acad. Sci. U. S. A.* **103**:13503-13508. doi: 0606026103 [pii].



- 351 5. **Fields, P. I., R. V. Swanson, C. G. Haidaris, and F. Heffron.** 1986. Mutants of *Salmonella*  
352 typhimurium that cannot survive within the macrophage are avirulent. *Proc. Natl. Acad. Sci. U.*  
353 *S. A.* **83**:5189-5193.
- 354 6. **Bäumler, A. J., J. G. Kusters, I. Stojiljkovic, and F. Heffron.** 1994. *Salmonella*  
355 typhimurium loci involved in survival within macrophages. *Infect. Immun.* **62**:1623-1630.
- 356 7. **Boutte, C. C., and S. Crosson.** 2013. Bacterial lifestyle shapes stringent response activation.  
357 *Trends Microbiol.* **21**:174-180. doi: 10.1016/j.tim.2013.01.002.
- 358 8. **Magnusson, L. U., A. Farewell, and T. Nyström.** 2005. ppGpp: a global regulator in  
359 *Escherichia coli*. *Trends Microbiol.* **13**:236-242. doi: S0966-842X(05)00078-8 [pii].
- 360 9. **Dalebroux, Z. D., S. L. Svensson, E. C. Gaynor, and M. S. Swanson.** 2010. ppGpp conjures  
361 bacterial virulence. *Microbiol. Mol. Biol. Rev.* **74**:171-199. doi: 10.1128/MMBR.00046-09  
362 [doi].
- 363 10. **Potrykus, K., and M. Cashel.** 2008. (p)ppGpp: still magical? *Annu. Rev. Microbiol.* **62**:35-  
364 51. doi: 10.1146/annurev.micro.62.081307.162903 [doi].
- 365 11. **Dong, T., and H. E. Schellhorn.** 2010. Role of RpoS in virulence of pathogens. *Infect.*  
366 *Immun.* **78**:887-897. doi: 10.1128/IAI.00882-09 [doi].
- 367 12. **Fang, F. C., S. J. Libby, N. A. Buchmeier, P. C. Loewen, J. Switala, J. Harwood, and D.**  
368 **G. Guiney.** 1992. The alternative sigma factor katF (rpoS) regulates *Salmonella* virulence. *Proc.*  
369 *Natl. Acad. Sci. U. S. A.* **89**:11978-11982.
- 370 13. **Kazmierczak, M. J., M. Wiedmann, and K. J. Boor.** 2005. Alternative Sigma Factors and  
371 Their Roles in Bacterial Virulence. *Microbiology and Molecular Biology Reviews.* **69**:527-543.  
372 doi: 10.1128/MMBR.69.4.527-543.2005.

- 373 14. **Battesti, A., N. Majdalani, and S. Gottesman.** 2011. The RpoS-Mediated General Stress  
374 Response in Escherichia coli. *Annu. Rev. Microbiol.* **65**:189-213. doi: 10.1146/annurev-micro-  
375 090110-102946.
- 376 15. **Bearson, S. M., W. H. Benjamin Jr, W. E. Swords, and J. W. Foster.** 1996. Acid shock  
377 induction of RpoS is mediated by the mouse virulence gene mviA of Salmonella typhimurium. *J.*  
378 *Bacteriol.* **178**:2572-2579.
- 379 16. **Muffler, A., D. Fischer, S. Altuvia, G. Storz, and R. Hengge-Aronis.** 1996. The response  
380 regulator RssB controls stability of the sigma(S) subunit of RNA polymerase in Escherichia coli.  
381 *EMBO J.* **15**:1333-1339.
- 382 17. **Pratt, L. A., and T. J. Silhavy.** 1996. The response regulator SprE controls the stability of  
383 RpoS. *Proc. Natl. Acad. Sci. U. S. A.* **93**:2488-2492.
- 384 18. **Zhou, Y., S. Gottesman, J. R. Hoskins, M. R. Maurizi, and S. Wickner.** 2001. The RssB  
385 response regulator directly targets sigma(S) for degradation by ClpXP. *Genes Dev.* **15**:627-637.  
386 doi: 10.1101/gad.864401 [doi].
- 387 19. **Bougdoor, A., S. Wickner, and S. Gottesman.** 2006. Modulating RssB activity: IraP, a  
388 novel regulator of sigma(S) stability in Escherichia coli. *Genes Dev.* **20**:884-897. doi: 20/7/884  
389 [pii].
- 390 20. **Bougdoor, A., C. Cuning, P. J. Baptiste, T. Elliott, and S. Gottesman.** 2008. Multiple  
391 pathways for regulation of sigmaS (RpoS) stability in Escherichia coli via the action of multiple  
392 anti-adaptors. *Mol. Microbiol.* **68**:298-313.
- 393 21. **Bougdoor, A., and S. Gottesman.** 2007. ppGpp regulation of RpoS degradation via anti-  
394 adaptor protein IraP. *Proc. Natl. Acad. Sci. U. S. A.* **104**:12896-12901. doi: 0705561104 [pii].

- 395 22. **Chiang, S. M., T. Dong, T. A. Edge, and H. E. Schellhorn.** 2011. Phenotypic diversity  
396 caused by differential RpoS activity among environmental *Escherichia coli* isolates. *Appl.*  
397 *Environ. Microbiol.* **77**:7915-7923. doi: 10.1128/AEM.05274-11 [doi].
- 398 23. **Dong, T., S. Chiang, C. Joyce, R. Yu, and H. Schellhorn.** 2009. Polymorphism and  
399 selection of *rpoS* in pathogenic *Escherichia coli*. *BMC Microbiology.* **9**:118.
- 400 24. **Chen, G., C. L. Patten, and H. E. Schellhorn.** 2004. Positive selection for loss of RpoS  
401 function in *Escherichia coli*. *Mutation Research/Fundamental and Molecular Mechanisms of*  
402 *Mutagenesis.* **554**:193-203. doi: <http://dx.doi.org/10.1016/j.mrfmmm.2004.04.013>.
- 403 25. **Lo, T. C.** 1977. The molecular mechanism of dicarboxylic acid transport in *Escherichia coli*  
404 K 12. *J. Supramol. Struct.* **7**:463-480. doi: 10.1002/jss.400070316 [doi].
- 405 26. **Boogerd, F. C., L. Boe, O. Michelsen, and P. R. Jensen.** 1998. *atp* Mutants of *Escherichia*  
406 *coli* Fail To Grow on Succinate Due to a Transport Deficiency. *J. Bacteriol.* **180**:5855-5859.
- 407 27. **Davies, S. J., P. Golby, D. Omrani, S. A. Broad, V. L. Harrington, J. R. Guest, D. J.**  
408 **Kelly, and S. C. Andrews.** 1999. Inactivation and Regulation of the Aerobic C4-Dicarboxylate  
409 Transport (*dctA*) Gene of *Escherichia coli*. .
- 410 28. **Zou, S. B., S. J. Hersch, H. Roy, J. B. Wiggers, A. S. Leung, S. Buranyi, J. L. Xie, K.**  
411 **Dare, M. Ibba, and W. W. Navarre.** 2012. Loss of elongation factor P disrupts bacterial outer  
412 membrane integrity. *J. Bacteriol.* **194**:413-425.
- 413 29. **Navarre, W. W., S. B. Zou, H. Roy, J. L. Xie, A. Savchenko, A. Singer, E. Edvokimova,**  
414 **L. R. Prost, R. Kumar, M. Ibba, and F. C. Fang.** 2010. *PoxA*, *YjeK*, and elongation factor P  
415 coordinately modulate virulence and drug resistance in *Salmonella enterica*. *Mol. Cell.* **39**:209-  
416 221. doi: DOI: 10.1016/j.molcel.2010.06.021.

- 417 30. **Hersch, S. J., M. Wang, S. B. Zou, K. Moon, L. J. Foster, M. Ibba, and W. W. Navarre.**  
418 2013. Divergent protein motifs direct elongation factor P-mediated translational regulation in  
419 *Salmonella enterica* and *Escherichia coli*. *MBio*. **4**:
- 420 31. **Bochner, B. R., P. Gadzinski, and E. Panomitros.** 2001. Phenotype MicroArrays for High-  
421 Throughput Phenotypic Testing and Assay of Gene Function. *Genome Res.* **11**:1246-1255.
- 422 32. **Hengge-Aronis, R.** 2002. Signal Transduction and Regulatory Mechanisms Involved in  
423 Control of the  $\sigma^S$  (RpoS) Subunit of RNA Polymerase. *Microbiology and Molecular Biology*  
424 *Reviews*. **66**:373-395.
- 425 33. **Tannahill, G. M., A. M. Curtis, J. Adamik, E. Palsson-McDermott, A. F. McGettrick,**  
426 **G. Goel, C. Frezza, N. J. Bernard, B. Kelly, N. H. Foley, L. Zheng, A. Gardet, Z. Tong, S. S.**  
427 **Jany, S. C. Corr, M. Haneklaus, B. E. Caffrey, K. Pierce, S. Walmsley, F. C. Beasley, E.**  
428 **Cummins, V. Nizet, M. Whyte, C. T. Taylor, H. Lin, S. L. Masters, E. Gottlieb, V. P. Kelly,**  
429 **C. Clish, P. E. Auron, R. J. Xavier, and L. A. J. O'Neill.** 2013. Succinate is an inflammatory  
430 signal that induces IL-1 $\beta$  through HIF-1 $\alpha$ . *Nature*. **496**:238-242.
- 431 34. **Alpuche Aranda, C.M., J. A. Swanson, W. P. Loomis, and S. I. Miller.** 1992. *Salmonella*  
432 *typhimurium* activates virulence gene transcription within acidified macrophage phagosomes.  
433 *Proc. Natl. Acad. Sci. U. S. A.* **89**:10079-10083.
- 434 35. **Rathman, M., M. D. Sjaastad, and S. Falkow.** 1996. Acidification of phagosomes  
435 containing *Salmonella typhimurium* in murine macrophages. *Infect. Immun.* **64**:2765-2773.
- 436 36. **Steinmetz, P. A., S. Wörner, and G. Unden.** 2014. Differentiation of DctA and DcuS  
437 function in the DctA/DcuS sensor complex of *Escherichia coli*: function of DctA as an activity  
438 switch and of DcuS as the C4-dicarboxylate sensor. *Molecular Microbiology*. **94**:218-229. doi:  
439 10.1111/mmi.12759.

- 440 37. **Durfee, T., A. M. Hansen, H. Zhi, F. R. Blattner, and D. J. Jin.** 2008. Transcription  
441 profiling of the stringent response in *Escherichia coli*. *J. Bacteriol.* **190**:1084-1096. doi:  
442 JB.01092-07 [pii].
- 443 38. **Traxler, M. F., S. M. Summers, H. Nguyen, V. M. Zacharia, G. A. Hightower, J. T.**  
444 **Smith, and T. Conway.** 2008. The global, ppGpp-mediated stringent response to amino acid  
445 starvation in *Escherichia coli*. *Mol. Microbiol.* **68**:1128-1148. doi: 10.1111/j.1365-  
446 2958.2008.06229.x.
- 447 39. **Merrikh, H., A. E. Ferrazzoli, and S. T. Lovett.** 2009. Growth phase and (p)ppGpp control  
448 of IraD, a regulator of RpoS stability, in *Escherichia coli*. *J. Bacteriol.* **191**:7436-7446. doi:  
449 10.1128/JB.00412-09 [doi].
- 450 40. **Spiga, L., M. G. Winter, T. Furtado de Carvalho, W. Zhu, E. R. Hughes, C. C. Gillis, C.**  
451 **L. Behrendt, J. Kim, D. Chessa, H. L. Andrews-Polymenis, D. P. Beiting, R. L. Santos, L.**  
452 **V. Hooper, and S. E. Winter.** 2017. An Oxidative Central Metabolism Enables *Salmonella* to  
453 Utilize Microbiota-Derived Succinate. *Cell Host & Microbe.* **22**:291-301.e6. doi:  
454 <https://doi.org/10.1016/j.chom.2017.07.018>.
- 455 41. **Winter, S. E., P. Thiennimitr, M. G. Winter, B. P. Butler, D. L. Huseby, R. W.**  
456 **Crawford, J. M. Russell, C. L. Bevins, L. G. Adams, R. M. Tsolis, J. R. Roth, and A. J.**  
457 **Bäumler.** 2010. Gut inflammation provides a respiratory electron acceptor for *Salmonella*.  
458 *Nature.* **467**:426-429. doi: 10.1038/nature09415 [doi].
- 459 42. **Hensel, M., A. P. Hinsley, T. Nikolaus, G. Sawers, and B. C. Berks.** 1999. The genetic  
460 basis of tetrathionate respiration in *Salmonella typhimurium*. *Mol. Microbiol.* **32**:275-287. doi:  
461 mmi1345 [pii].
- 462 43. **Thiennimitr, P., S. E. Winter, M. G. Winter, M. N. Xavier, V. Tolstikov, D. L. Huseby,**  
463 **T. Sterzenbach, R. M. Tsolis, J. R. Roth, and A. J. Bäumler.** 2011. Intestinal inflammation

- 464 allows *Salmonella* to use ethanolamine to compete with the microbiota. *Proc. Natl. Acad. Sci. U.*  
465 *S. A.* **108**:17480-17485. doi: 10.1073/pnas.1107857108 [doi].
- 466 44. **Datsenko, K. A., and B. L. Wanner.** 2000. One-step inactivation of chromosomal genes in  
467 *Escherichia coli* K-12 using PCR products. *Proc. Natl. Acad. Sci.* **97**:6640-6645.
- 468 45. **Schmieger, H.** 1971. A method for detection of phage mutants with altered transducing  
469 ability. *Molecular and General Genetics MGG.* **110**:378-381. doi: 10.1007/BF00438281.
- 470 46. **Baba, T., T. Ara, M. Hasegawa, Y. Takai, Y. Okumura, M. Baba, K. A. Datsenko, M.**  
471 **Tomita, B. L. Wanner, and H. Mori.** 2006. Construction of *Escherichia coli* K-12 in-frame,  
472 single-gene knockout mutants: the Keio collection. *Mol Syst Biol.* **2**:.
- 473 47. **Beltran, P., S. A. Plock, N. H. Smith, T. S. Whittam, D. C. Old, and R. K. Selander.**  
474 1991. Reference collection of strains of the *Salmonella typhimurium* complex from natural  
475 populations. *Microbiology.* **137**:601-606. doi: 10.1099/00221287-137-3-601.
- 476 48. **Boyd, E. F., F. Wang, P. Beltran, S. A. Plock, K. Nelson, and R. K. Selander.** 1993.  
477 *Salmonella* reference collection B (SARB): strains of 37 serovars of subspecies I. *Microbiology.*  
478 **139**:1125-1132. doi: 10.1099/00221287-139-6-1125.
- 479 49. **Boyd, E. F., F. S. Wang, T. S. Whittam, and R. K. Selander.** 1996. Molecular genetic  
480 relationships of the salmonellae. *Appl. Environ. Microbiol.* **62**:804-808.
- 481 50. **Ochman, H., and R. K. Selander.** 1984. Standard reference strains of *Escherichia coli* from  
482 natural populations. *J. Bacteriol.* **157**:690-693.
- 483 51. **Urban, J., and J. Vogel.** 2009. A green fluorescent protein (GFP)-based plasmid system to  
484 study post-transcriptional control of gene expression *in vivo*, p. 301-319. *In* A. Serganov (ed.),  
485 vol. 540. Humana Press.

- 486 52. **Corcoran, C. P., D. Podkaminski, K. Papenfort, J. H. Urban, J. C. D. Hinton, and J.**  
487 **Vogel.** 2012. Superfolder GFP reporters validate diverse new mRNA targets of the classic porin  
488 regulator, MicF RNA. *Mol. Microbiol.* **84**:428-445. doi: 10.1111/j.1365-2958.2012.08031.x.
- 489 53. **Pédélecq, J., S. Cabantous, T. Tran, T. C. Terwilliger, and G. S. Waldo.** 2006.  
490 Engineering and characterization of a superfolder green fluorescent protein. *Nat Biotech.* **24**:79-  
491 88.
- 492 54. **Loewen, P. C., and B. L. Triggs.** 1984. Genetic mapping of katF, a locus that with katE  
493 affects the synthesis of a second catalase species in *Escherichia coli*. *J. Bacteriol.* **160**:668-675.
- 494 55. **Cooper, C. A., K. Zhang, S. N. Andres, Y. Fang, N. A. Kaniuk, M. Hannemann, J. H.**  
495 **Brumell, L. J. Foster, M. S. Junop, and B. K. Coombes.** 2010. Structural and biochemical  
496 characterization of SrcA, a multi-cargo type III secretion chaperone in *Salmonella* required for  
497 pathogenic association with a host. *PLoS Pathog.* **6**:e1000751.  
498

499 **Figure Legends**

500 **Figure 1: *Salmonella* displays an extended lag phase using dicarboxylic acids as a sole**  
501 **carbon source** but *efp* and *rpoS* mutants do not. **A)** Representative growth curve of *Salmonella*  
502 Typhimurium 14028s strains grown in MOPS minimal media with 0.2% succinate as the sole  
503 carbon source. Data shows optical density at 600nm (OD<sub>600</sub>) for 48 hours from the time of  
504 inoculation. The data shown is representative of greater than three biological replicates. An  
505 OD<sub>600</sub> of 0.1 is emphasized by a dashed line. **B)** Graphs showing the average time in hours that  
506 wild-type (WT) or mutant *Salmonella* takes to reach an OD of 0.1 as an analog of the length of  
507 lag phase using succinate as the sole carbon source. The data shows the average of at least three  
508 biological replicates and error bars show one standard deviation. >48h indicates the strain did not  
509 grow by 48 hours. **C)** As in (B) but comparing the use of three different dicarboxylic acids as the  
510 sole carbon source.

511

512 **Figure 2: *Salmonella* grows significantly later than *E. coli* using succinate** as the sole carbon  
513 source. Growth in MOPS minimal media with 0.2% succinate as the sole carbon source. Growth  
514 was conducted in a TECAN Infinite M200 plate reader and reads were taken every 15 minutes.  
515 **A)** Representative growth curve. An OD<sub>600</sub> of 0.1 is emphasized by a dashed line. **B)** Percentage  
516 of SGSC *Salmonella* (green line) or ECOR *E. coli* (blue line) strains that (on average) had  
517 surpassed an OD<sub>600</sub> of 0.1 by indicated times post inoculation. Red line is for *Salmonella* but  
518 excludes the 14 tested strains of the SARC collection that do not belong to subspecies *enterica*.  
519 **C)** Overview of 105 *Salmonella* strains (SGSC collection) and 72 *E. coli* strains (ECOR  
520 collection). Each strain is plotted by average time it takes to reach OD 0.1 (x-axis) compared to  
521 doubling time during growth from OD 0.1 to OD 0.2. All *Salmonella* are coloured black and all  
522 *E. coli* strains are coloured red. Strains with at least one replicate that did not grow by 72 hours



523 are shown as triangles; these values are the average of the remaining replicates. Inset at top right  
524 shows zoomed out view to include outliers. **D)** Average time in hours for strains to reach an OD  
525 of 0.1. Data compares all 105 *Salmonella* strains to all 72 *E. coli* strains tested. Line indicates the  
526 median, boxes show the 25th to 75th percentiles, and whiskers show the 10th to 90th percentiles.  
527 An unpaired t-test with Welch's correction indicated a p-value < 0.0001. **E)** As in (D) but  
528 comparing doubling time in hours. An unpaired t-test with Welch's correction indicated a p-  
529 value < 0.05 with all data points included or p-value < 0.0001 when excluding slow growing  
530 outliers (doubling time > 5h).

531

532 **Figure 3: Deletion of the *IraP* results in early growth on succinate.** Growth of *Salmonella* in  
533 MOPS minimal media with 0.2% succinate as the sole carbon source. **A)** The three known RssB  
534 anti-adaptors were deleted from the *Salmonella* chromosome and growth is shown along with an  
535 *rssB* mutant. Data is representative of at least three biological replicates. **B)** Plasmid expression  
536 of the *Salmonella iraP* gene partially complements the growth delay phenotype. **C and D)**  
537 Graphs showing the average time in hours for wild-type (WT) or mutant *Salmonella* to reach an  
538 OD of 0.1 as an analog of the length of lag phase using succinate as the sole carbon source. The  
539 data shows the average of at least three biological replicates and error bars show one standard  
540 deviation.

541

542 **Figure 4: Specific nutrients induce growth using succinate and diauxic repression involves**  
543 **the stringent response. A and B)** Representative growth curves of *Salmonella* growth in MOPS  
544 minimal media with 0.2% succinate as the primary carbon source and supplemented with  
545 0.005% proline (+ Pro) or 0.005% citrate (+ Cit) where indicated. **C and D)** Graphs showing the  
546 average time in hours for *Salmonella* to reach an OD of 0.1 as an analog of the length of lag

547 phase using succinate as the sole carbon source. The data shows the average of at least three  
548 biological replicates and error bars show one standard deviation.

549

550 **Figure 5: Expression of *dctA* induces growth using succinate.** Growth of *Salmonella* in  
551 MOPS minimal media with 0.2% succinate as the sole carbon source. **A)** Overexpression of *dctA*  
552 from a plasmid. WT pLacZ and pDctA indicate wild-type *Salmonella* containing a pXG10sf  
553 plasmid encoding full length *lacZ* or *dctA* with expression driven by the constitutively active  
554 PLtet0-1 promoter. The *rpoS* mutant is shown for comparison. **B)** Stretches of the *E. coli* *dctA*  
555 promoter ( $P_{dctA}$ ) were inserted into the *Salmonella* chromosome replacing the native *dctA*  
556 promoter. The length inserted (in base-pairs counting back from the *dctA* start codon) are  
557 indicated. Replacement with *Salmonella*'s native *dctA* promoter controls for effects due to the  
558 insertion method ( $P_{dctA}$  *Salm.*). Wild-type *Salmonella* and *E. coli* K12 are shown for comparison.  
559 **C and D)** Graphs showing the average time in hours for wild-type (WT) or mutant *Salmonella* to  
560 reach an OD of 0.1 as an analog of the length of lag phase using succinate as the sole carbon  
561 source. The data shows the average of at least three biological replicates and error bars show one  
562 standard deviation.

563

564 **Figure 6: Replacement of the *Salmonella* *dctA* promoter does not influence survival in**  
565 **acidified succinate or macrophage.** **A)** Survival of *Salmonella* treated with LPM media  
566 containing 0.2% succinate and acidified to pH 4.4. Wild-type (WT) is compared to *Salmonella*  
567 with its chromosomal *dctA* promoter replaced with 500bp of the *E. coli* *dctA* promoter ( $P_{dctA}$  *E.*  
568 *coli*) or *Salmonella*'s native *dctA* promoter as a control ( $P_{dctA}$  *Salm.*). An *rpoS* mutant is shown as  
569 a positive control. CFU recovered at 3 hours were normalized to input CFU at 0h and expressed  
570 as percent survival. Data shows the average across three biological replicates and error bars

571 indicate one standard deviation. **B)** Infection of THP-1 human macrophage comparing survival  
572 of wild-type *Salmonella* (WT) with various mutant strains and the *dctA* promoter swap strain. A  
573 *phoP* mutant is included as a positive control. Data shows a logarithm of CFU recovered at 24  
574 hours post infection and is the average of three biological replicates. Error bars show one  
575 standard deviation. **C)** As in (B) but showing CFU recovered from mouse J774 macrophage.

576

577 **Figure 7: Working model of *Salmonella*'s response to succinate** as the sole carbon source.

578 IraP becomes induced and stabilizes RpoS. Since RpoS is an activator of transcription, it follows  
579 that its activity increases expression of an unknown repressor that turns off expression of *dctA*.

580 Since replacing the *Salmonella* *dctA* promoter with the *E. coli* one induces growth on succinate,  
581 it is likely that this repressor binds to a region that is divergent between the two promoters.

582 Without DctA, the cells do not import their only carbon source (succinate) and do not grow. The  
583 stringent response second messenger ppGpp and supplemented proline or citrate influence  
584 growth using succinate; however, their mechanism and position in the signalling cascade remains  
585 uncertain.

586

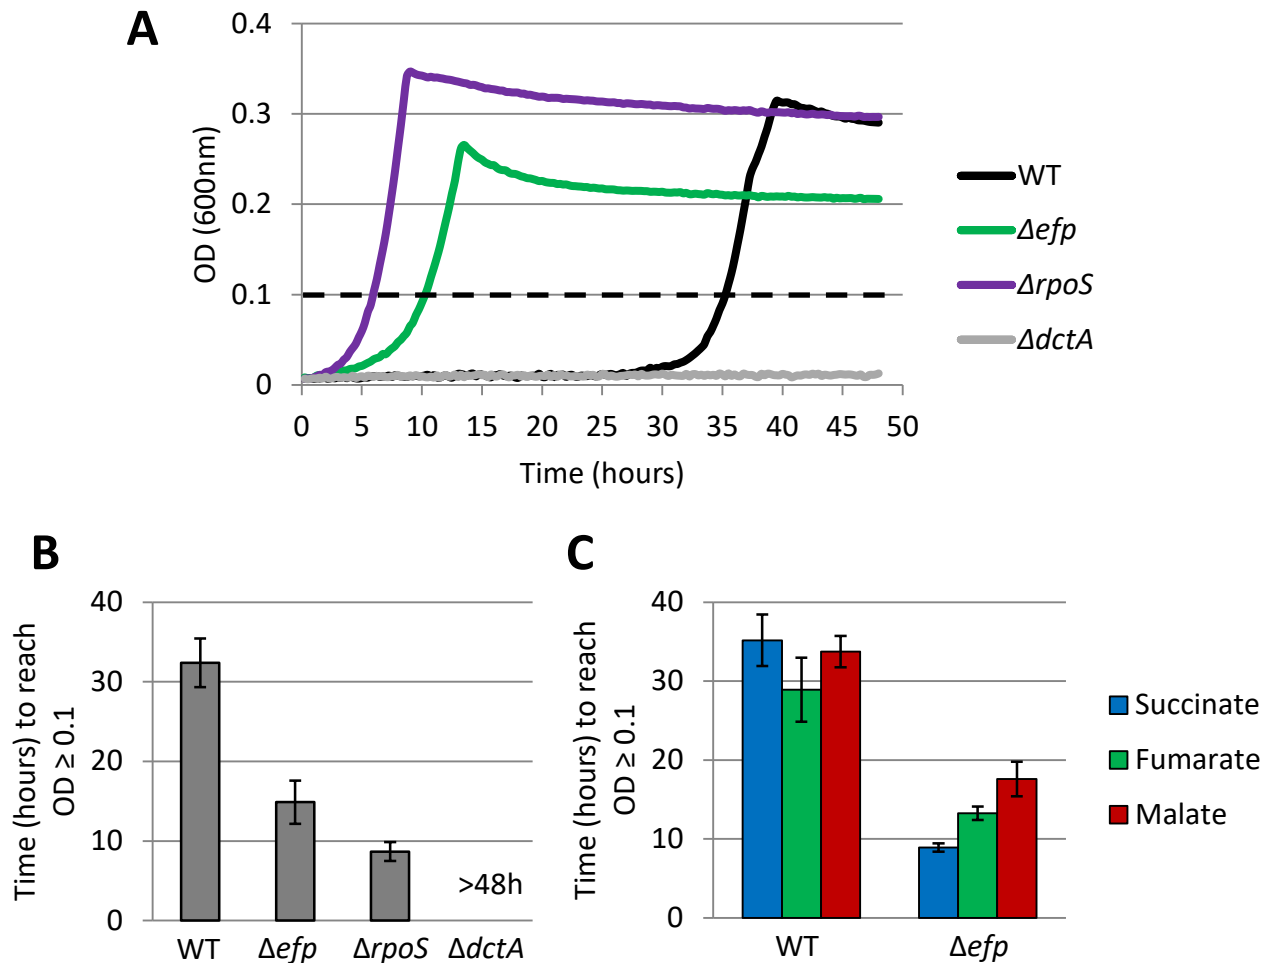

**Figure 1: *Salmonella* displays an extended lag phase using dicarboxylic acids as a sole carbon source but *efp* and *rpoS* mutants do not. **A)** Representative growth curve of *Salmonella* Typhimurium 14028s strains grown in MOPS minimal media with 0.2% succinate as the sole carbon source. Data shows optical density at 600nm (OD<sub>600</sub>) for 48 hours from the time of inoculation. The data shown is representative of greater than three biological replicates. An OD<sub>600</sub> of 0.1 is emphasized by a dashed line. **B)** Graphs showing the average time in hours that wild-type (WT) or mutant *Salmonella* takes to reach an OD of 0.1 as an analog of the length of lag phase using succinate as the sole carbon source. The data shows the average of at least three biological replicates and error bars show one standard deviation. >48h indicates the strain did not grow by 48 hours. **C)** As in (B) but comparing the use of three different dicarboxylic acids as the sole carbon source.**

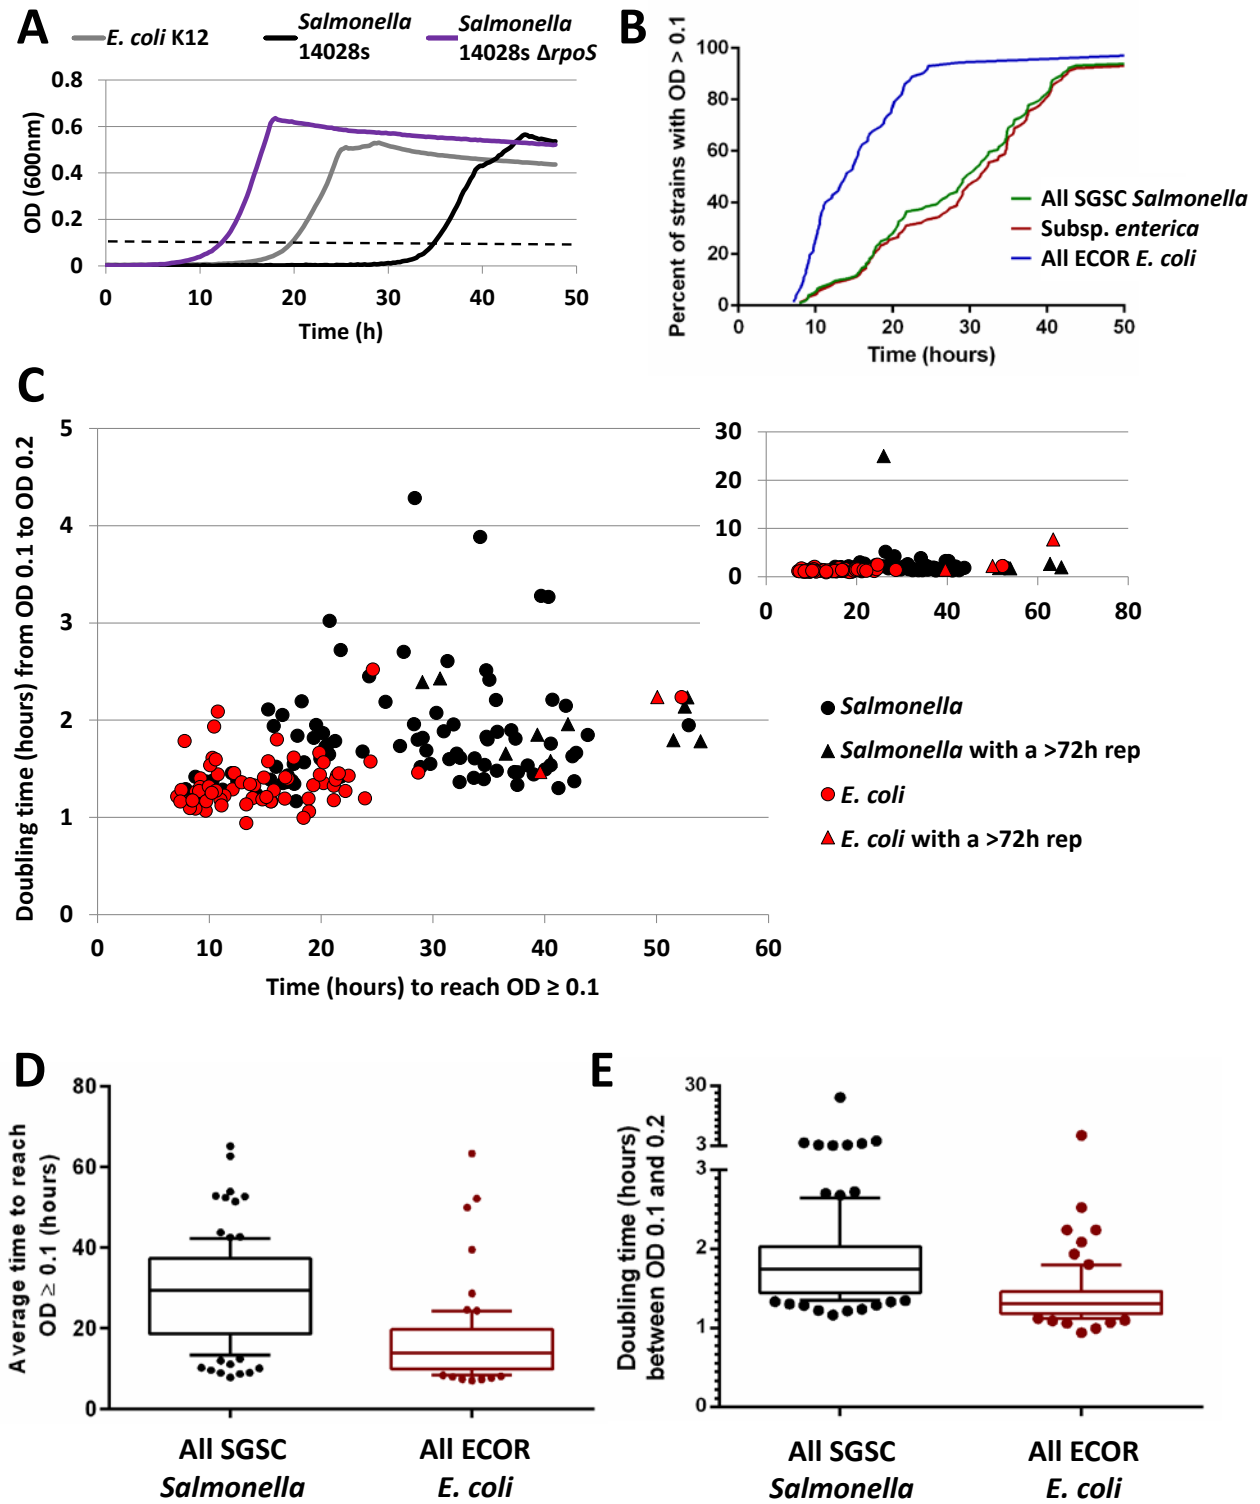

Figure 2

**Figure 2: *Salmonella* grows significantly later than *E. coli* using succinate as the sole carbon source.** Growth in MOPS minimal media with 0.2% succinate as the sole carbon source. Growth was conducted in a TECAN Infinite M200 plate reader and reads were taken every 15 minutes. **A)** Representative growth curve. An OD<sub>600</sub> of 0.1 is emphasized by a dashed line. **B)** Percentage of SGSC *Salmonella* (green line) or ECOR *E. coli* (blue line) strains that (on average) had surpassed an OD<sub>600</sub> of 0.1 by indicated times post inoculation. Red line is for *Salmonella* but excludes the 14 tested strains of the SARC collection that do not belong to subspecies *enterica*. **C)** Overview of 105 *Salmonella* strains (SGSC collection) and 72 *E. coli* strains (ECOR collection). Each strain is plotted by average time it takes to reach OD 0.1 (x-axis) compared to doubling time during growth from OD 0.1 to OD 0.2. All *Salmonella* are coloured black and all *E. coli* strains are coloured red. Strains with at least one replicate that did not grow by 72 hours are shown as triangles; these values are the average of the remaining replicates. Inset at top right shows zoomed out view to include outliers. **D)** Average time in hours for strains to reach an OD of 0.1. Data compares all 105 *Salmonella* strains to all 72 *E. coli* strains tested. Line indicates the median, boxes show the 25th to 75th percentiles, and whiskers show the 10th to 90th percentiles. An unpaired t-test with Welch's correction indicated a p-value < 0.0001. **E)** As in (D) but comparing doubling time in hours. An unpaired t-test with Welch's correction indicated a p-value < 0.05 with all data points included or p-value < 0.0001 when excluding slow growing outliers (doubling time > 5h).

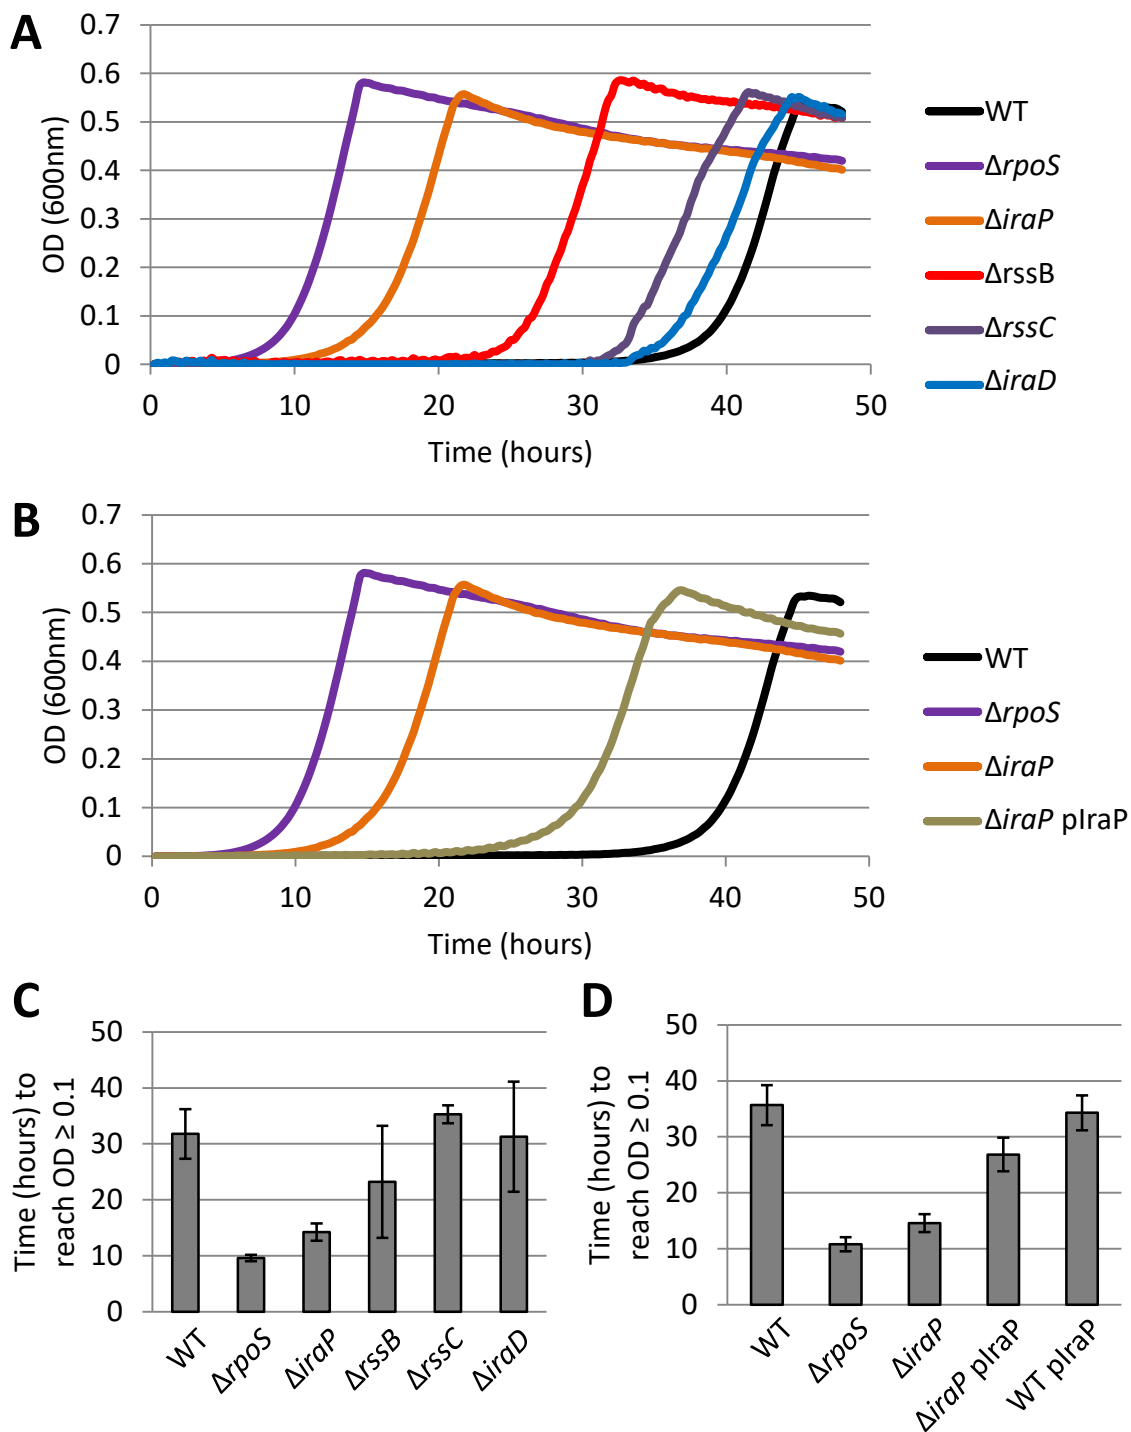

**Figure 3: Deletion of the *IraP* results in early growth on succinate.** Growth of *Salmonella* in MOPS minimal media with 0.2% succinate as the sole carbon source. **A)** The three known RssB anti-adaptors were deleted from the *Salmonella* chromosome and growth is shown along with an *rssB* mutant. Data is representative of at least three biological replicates. **B)** Plasmid expression of the *Salmonella iraP* gene partially complements the growth delay phenotype. **C and D)** Graphs showing the average time in hours for wild-type (WT) or mutant *Salmonella* to reach an OD of 0.1 as an analog of the length of lag phase using succinate as the sole carbon source. The data shows the average of at least three biological replicates and error bars show one standard deviation.

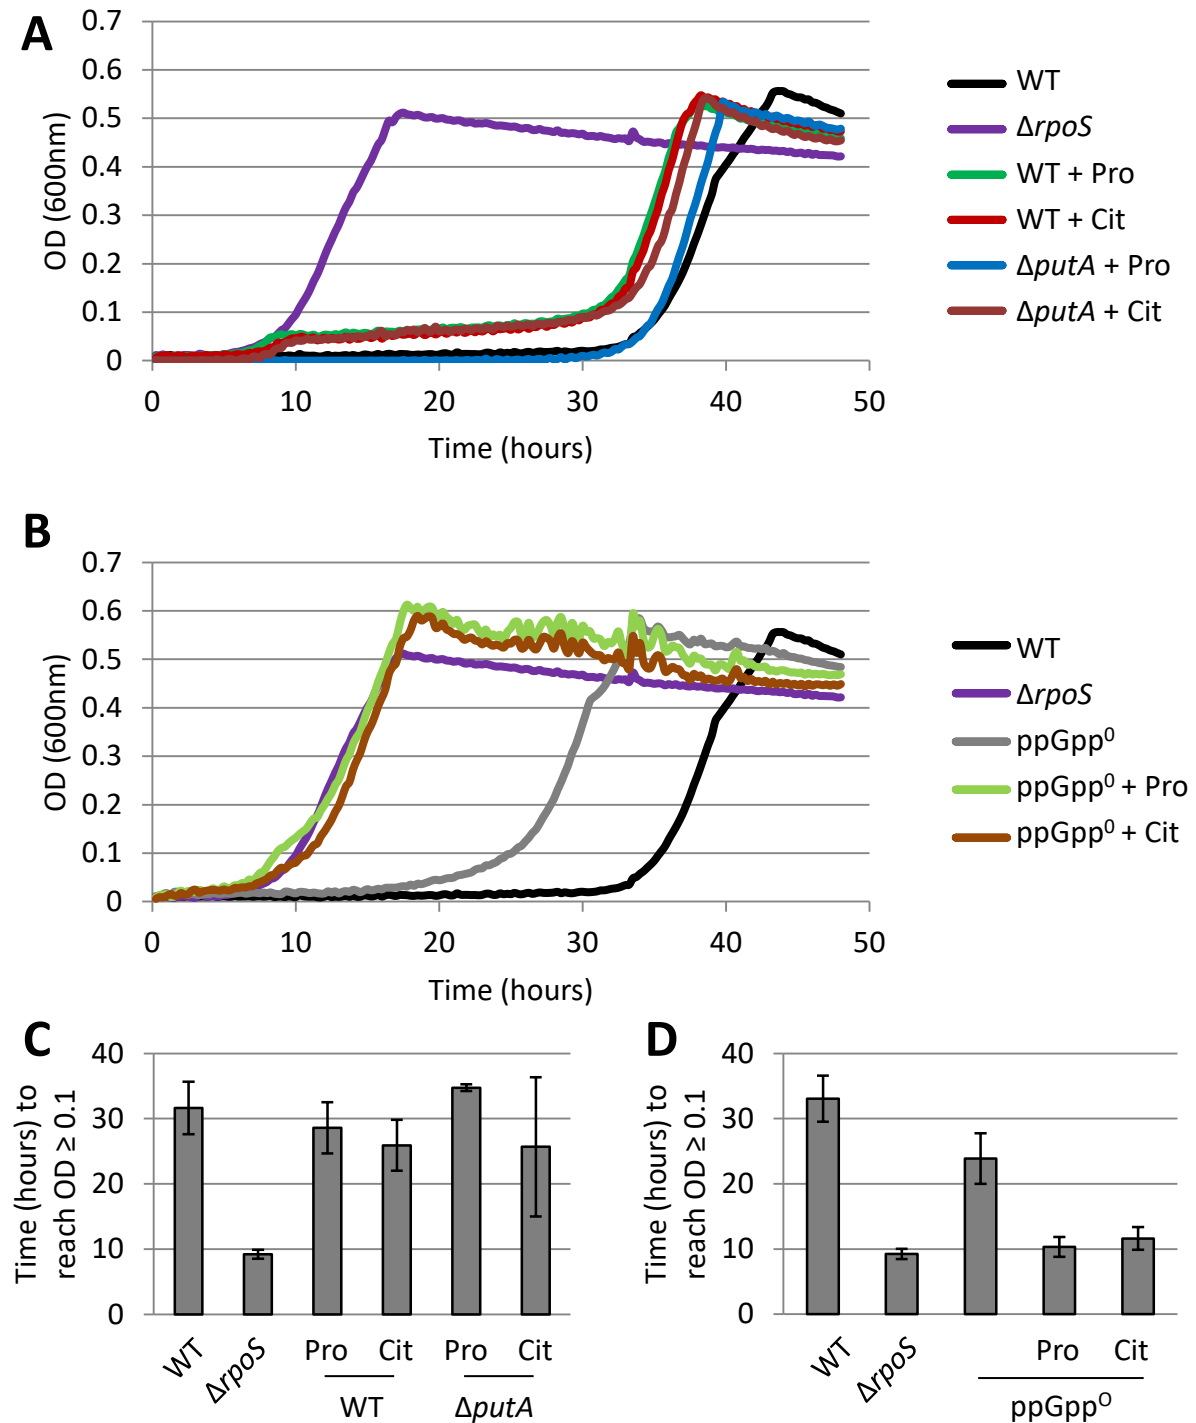

**Figure 4: Specific nutrients induce growth using succinate and diauxic repression involves the stringent response. A and B)** Representative growth curves of *Salmonella* growth in MOPS minimal media with 0.2% succinate as the primary carbon source and supplemented with 0.005% proline (+ Pro) or 0.005% citrate (+ Cit) where indicated. **C and D)** Graphs showing the average time in hours for *Salmonella* to reach an OD of 0.1 as an analog of the length of lag phase using succinate as the sole carbon source. The data shows the average of at least three biological replicates and error bars show one standard deviation.



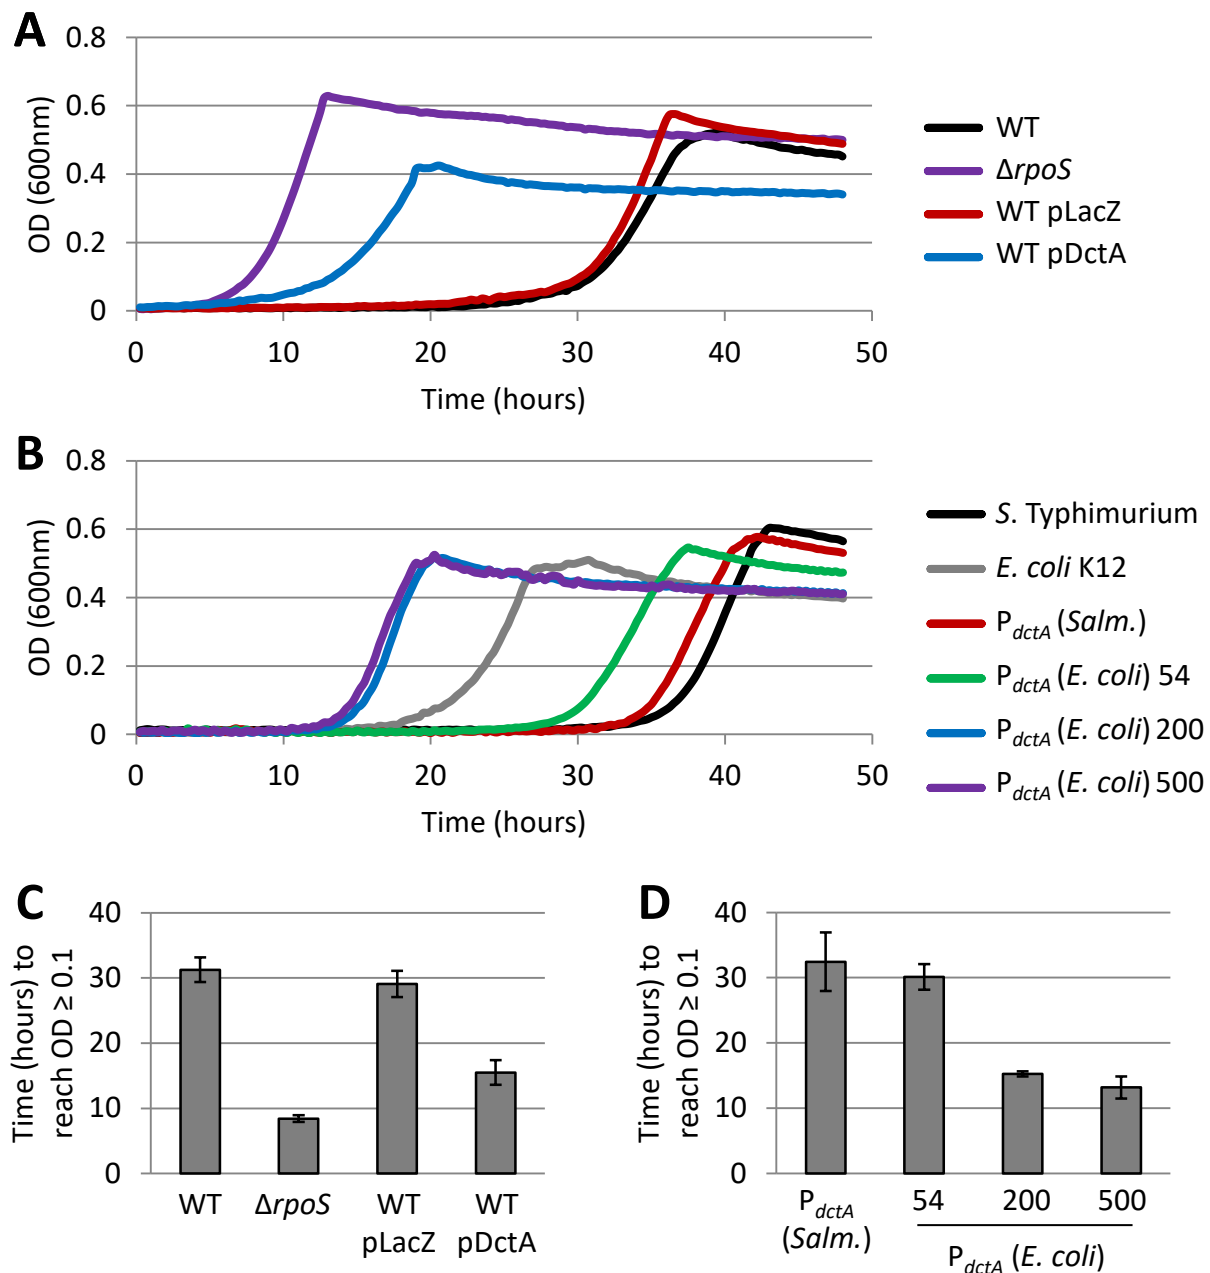

**Figure 5: Expression of *dctA* induces growth using succinate.** Growth of *Salmonella* in MOPS minimal media with 0.2% succinate as the sole carbon source. **A)** Overexpression of *dctA* from a plasmid. WT pLacZ and pDctA indicate wild-type *Salmonella* containing a pXG10sf plasmid encoding full length *lacZ* or *dctA* with expression driven by the constitutively active PLtet0-1 promoter. The *rpoS* mutant is shown for comparison. **B)** Stretches of the *E. coli* *dctA* promoter ( $P_{dctA}$ ) were inserted into the *Salmonella* chromosome replacing the native *dctA* promoter. The length inserted (in base-pairs counting back from the *dctA* start codon) are indicated. Replacement with *Salmonella*'s native *dctA* promoter controls for effects due to the insertion method ( $P_{dctA}$  Salm.). Wild-type *Salmonella* and *E. coli* K12 are shown for comparison. **C and D)** Graphs showing the average time in hours for wild-type (WT) or mutant *Salmonella* to reach an OD of 0.1 as an analog of the length of lag phase using succinate as the sole carbon source. The data shows the average of at least three biological replicates and error bars show one standard deviation.

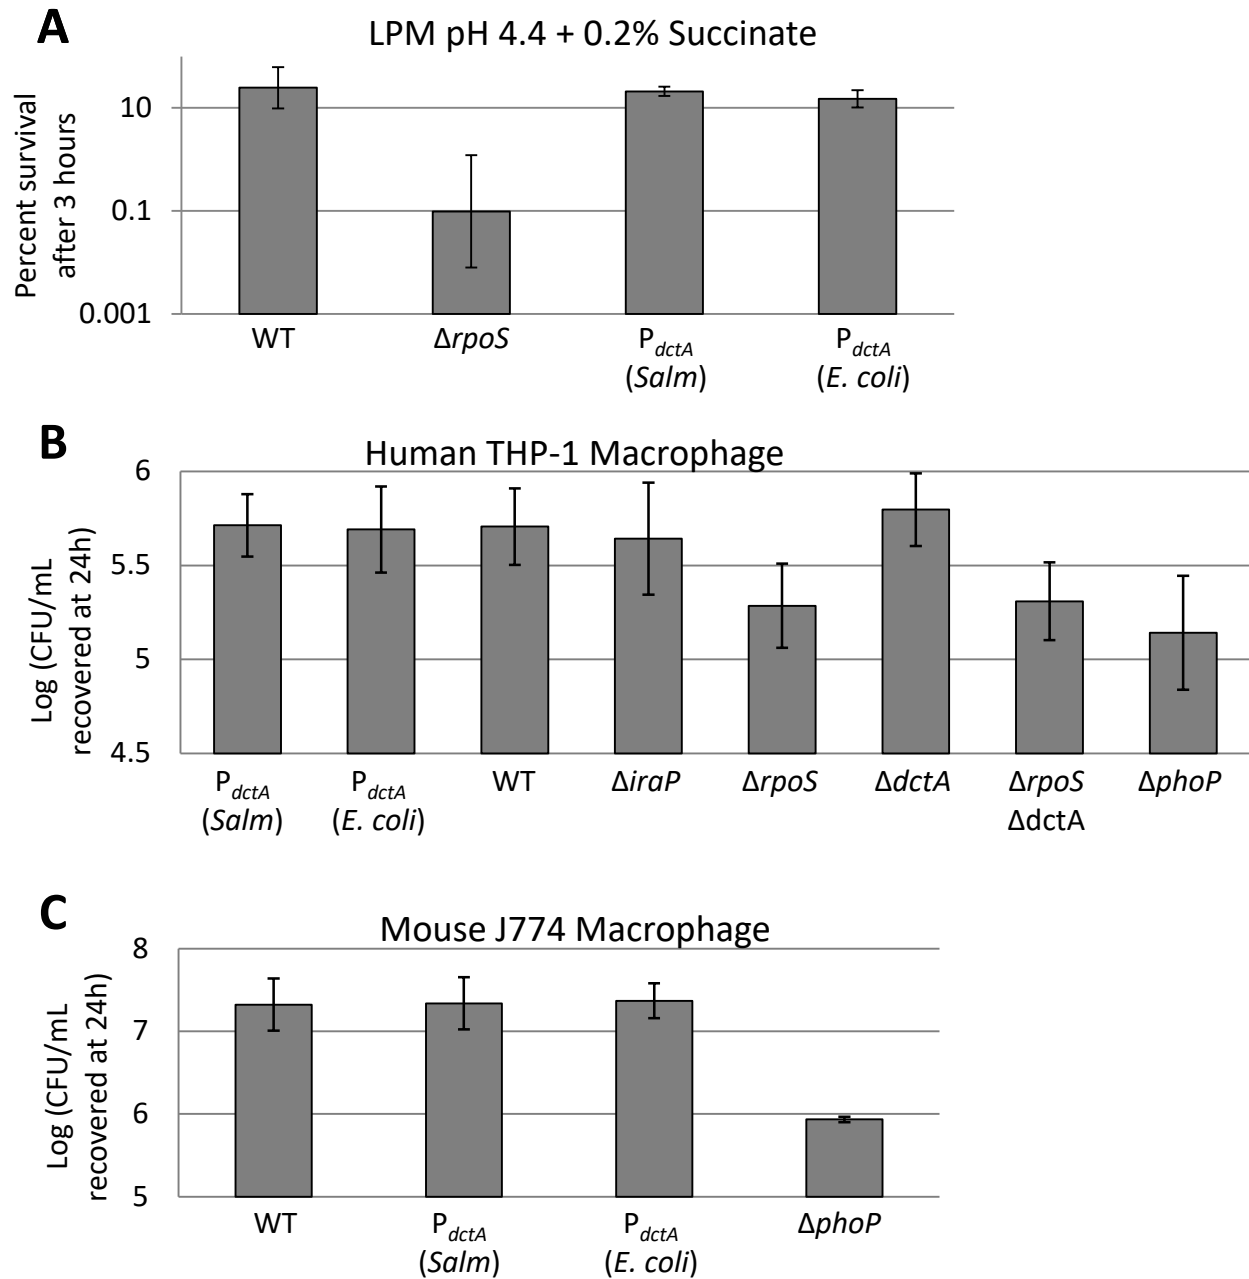

**Figure 6: Replacement of the *Salmonella* *dctA* promoter does not influence survival in acidified succinate or macrophage. A)** Survival of *Salmonella* treated with LPM media acidified succinate or macrophage. **A)** Survival of *Salmonella* treated with LPM media containing 0.2% succinate and acidified to pH 4.4. Wild-type (WT) is compared to *Salmonella* with its chromosomal *dctA* promoter replaced with 500bp of the *E. coli* *dctA* promoter ( $P_{dctA}$  *E. coli*) or *Salmonella*'s native *dctA* promoter as a control ( $P_{dctA}$  *Salm*). An *rpoS* mutant is shown as a positive control. CFU recovered at 3 hours were normalized to input CFU at 0h and expressed as percent survival. Data shows the average across three biological replicates and error bars indicate one standard deviation. **B)** Infection of THP-1 human macrophage comparing survival of wild-type *Salmonella* (WT) with various mutant strains and the *dctA* promoter swap strain. A *phoP* mutant is included as a positive control. Data shows a logarithm of CFU recovered at 24 hours post infection and is the average of three biological replicates. Error bars show one standard deviation. **C)** As in (B) but showing CFU recovered from mouse J774 macrophage.

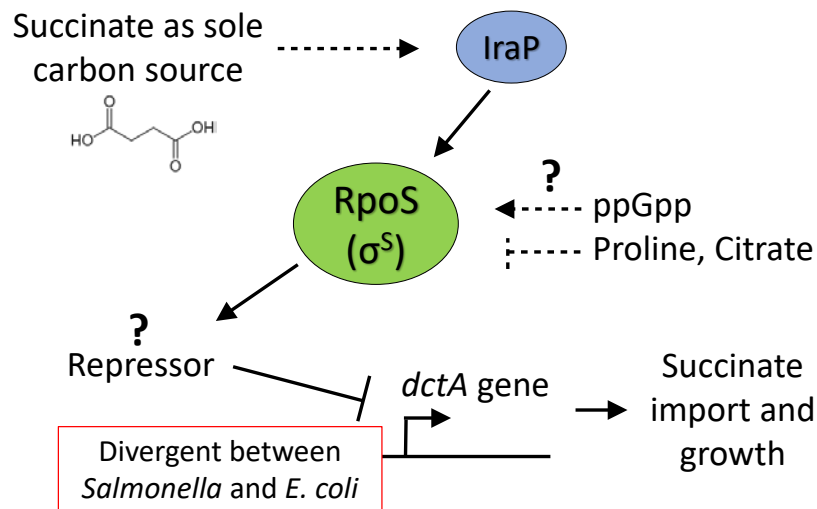

**Figure 7: Working model of *Salmonella*'s response to succinate** as the sole carbon source. IraP becomes induced and stabilizes RpoS. Since RpoS is an activator of transcription, it follows that its activity increases expression of an unknown repressor that turns off expression of *dctA*. Since replacing the *Salmonella* *dctA* promoter with the *E. coli* one induces growth on succinate, it is likely that this repressor binds to a region that is divergent between the two promoters. Without DctA, the cells do not import their only carbon source (succinate) and do not grow. The stringent response second messenger ppGpp and supplemented proline or citrate influence growth using succinate; however, their mechanism and position in the signalling cascade remains uncertain.
